# Supplementary material for: Regulation of closely juxtaposed proto-oncogene c-fms and HMGXB3 gene expression by mRNA 3′ end polymorphism in breast cancer cells
Source: PubMed Central journal article supplement — RNA. 2021 Sep;27(9):1068–81. doi: 10.1261/rna.078749.121 (PMC8370744; doi:10.1261/rna.078749.121), 2021-09
Supplement: supp_078749.121_Supplemental_Fig_S1.pdf [file supp_078749.121_Supplemental_Fig_S1.pdf]

# Probe 1 generation

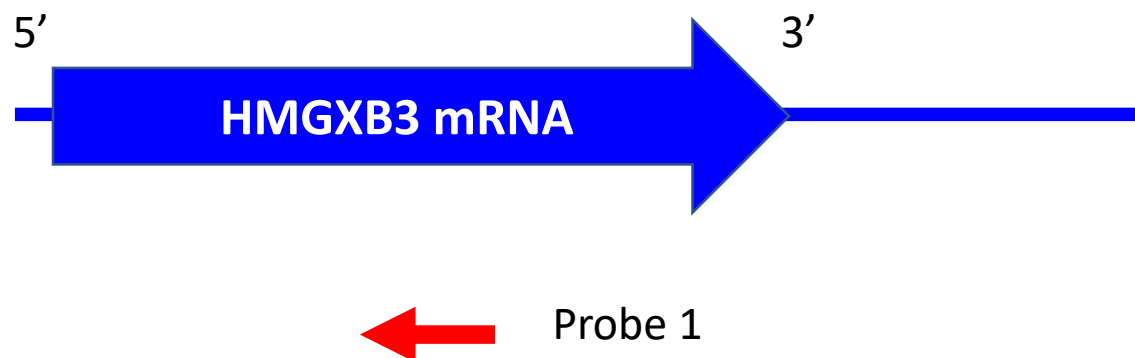

Antisense RNA probe 1 was generated from HMGXB3 mRNA (+3241 ~ +3541). The HMGXB3 cDNA template was PCR amplified and 3' end was tagged with T7 RNA polymerase promoter. *In vitro* transcription was performed with  $^{32}\text{P}$ -UTP and T7 RNA polymerase to synthesize  $^{32}\text{P}$ -labeled antisense RNA probe 1. After *in vitro* transcription, template DNA was removed by DNase I. PCR primers are listed in Supplemental\_Table\_S1.

# Probe 2 generation

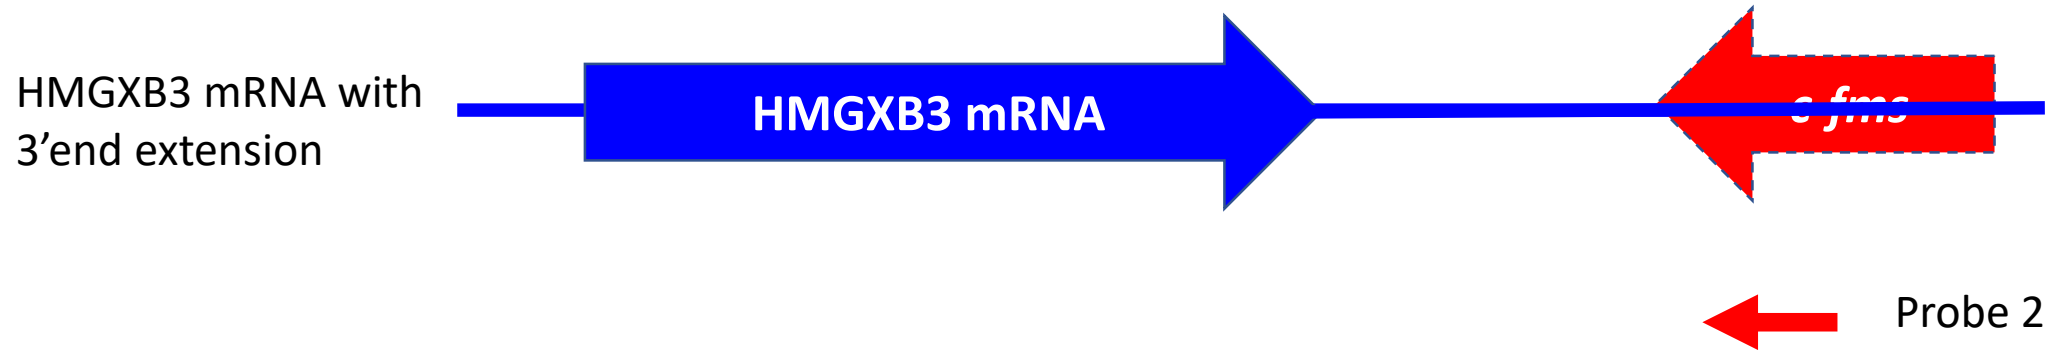

Antisense RNA probe 2 was generated from HMGXB3 mRNA 3'end extension, which overlaps with *c-fms* mRNA 3'end (+3361 ~ +3841). The cDNA template was PCR amplified and 3'end was tagged with T7 RNA polymerase promoter. *In vitro* transcription was performed with  $^{32}\text{P}$ -UTP and T7 RNA polymerase to synthesize  $^{32}\text{P}$ -labeled antisense RNA probe 2. After *in vitro* transcription, template DNA was removed by DNase I.

PCR primers are listed in Supplemental\_Table\_S1.

# Probe 3 generation

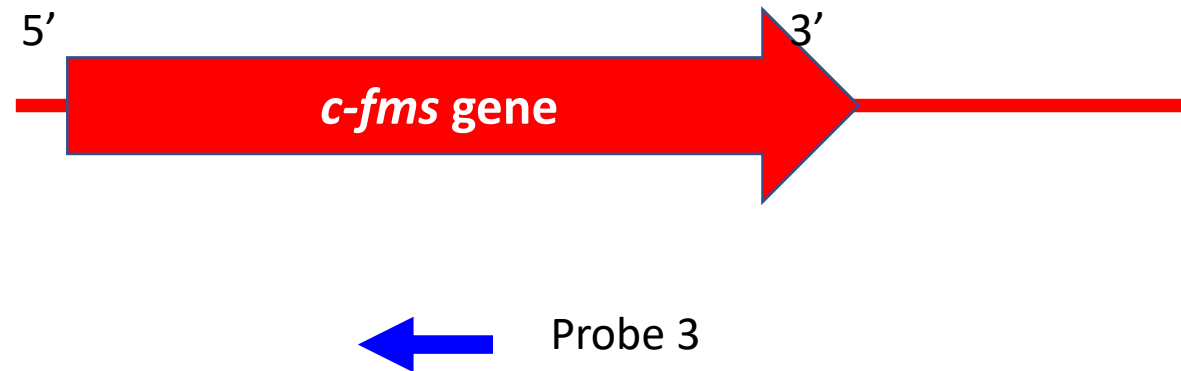

Antisense RNA probe 3 was generated from *c-fms* mRNA (+2101 ~ +2421). The cDNA template was PCR amplified and 3' end was tagged with T7 RNA polymerase promoter. *In vitro* transcription was performed with  $^{32}\text{P}$ -UTP and T7 RNA polymerase to synthesize  $^{32}\text{P}$ -labeled antisense RNA probe 3. After *in vitro* transcription, template DNA was removed by DNase I. PCR primers are listed in Supplemental\_Table\_S1.

# Probe 4 generation

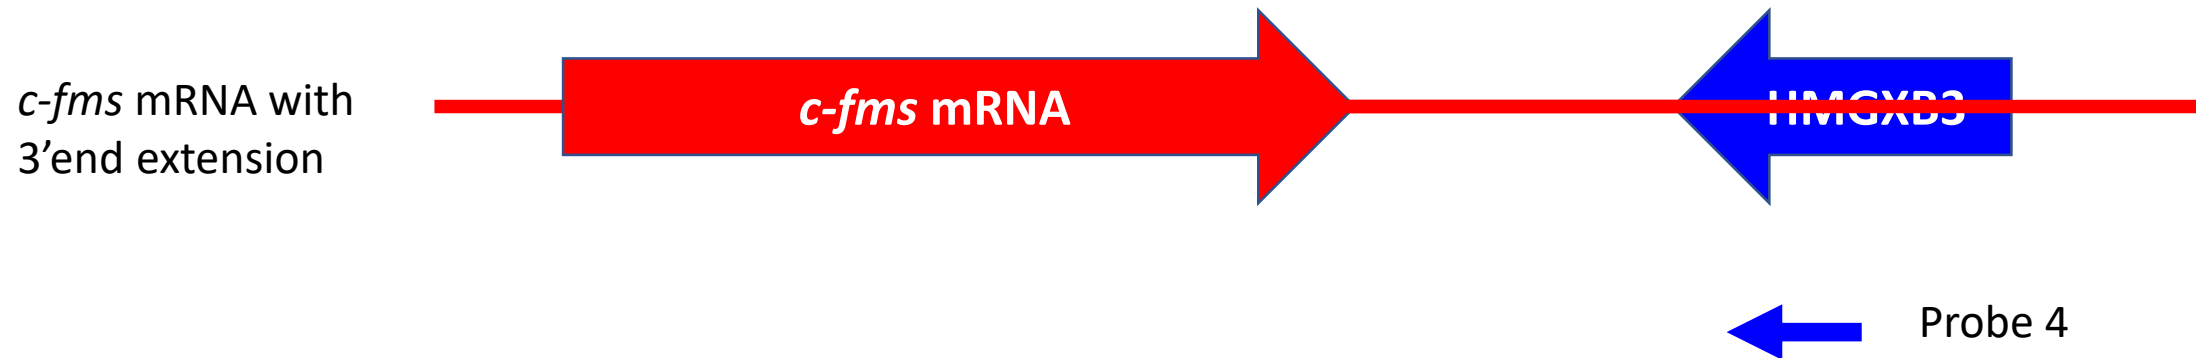

Antisense RNA probe 4 was generated from *c-fms* mRNA 3' end extension, which overlaps with HMGXB3 mRNA 3' end (+4631 ~ +5041). The cDNA template was PCR amplified and 3' end was tagged by T7 RNA polymerase promoter. *In vitro* transcription was performed with  $^{32}\text{P}$ -UTP and T7 RNA polymerase to synthesize  $^{32}\text{P}$ -labeled antisense RNA probe 4. After *in vitro* transcription, template DNA was removed by DNase I. PCR primers are listed in Supplemental\_Table\_S1.
